# Supplementary material for: One-step synthesis of a hierarchical self-supported WS2 film for efficient electrocatalytic hydrogen evolution
Source: Royal Society of Chemistry journal article supplement (doi:10.1039/c9ta07868a), 2019-01-01
Supplement: c9ta07868a1.pdf [file c9ta07868a1.pdf]

Electronic Supplementary Information

**One-step Synthesis of Hierarchical Self-supported WS<sub>2</sub> Film for Efficient  
Electrocatalytic Hydrogen Evolution**

*Min Wang<sup>1</sup>, Li Zhang<sup>2</sup>, Meirong Huang<sup>1</sup>, Qifan Zhang<sup>1</sup>, Xuanliang Zhao<sup>1</sup>, Yijia He<sup>1</sup>, Shuyuan  
Lin<sup>1</sup>, Jialiang Pan<sup>1</sup>, Hongwei Zhu<sup>1</sup>*

<sup>1</sup>State Key Lab of New Ceramics and Fine Processing, School of Materials Science and  
Engineering, Tsinghua University, Beijing 100084, China

<sup>2</sup>Key Laboratory of Photochemical Conversion and Optoelectronic Materials, Technical  
Institute of Physics and Chemistry, Chinese Academy of Sciences, Beijing 100190, China

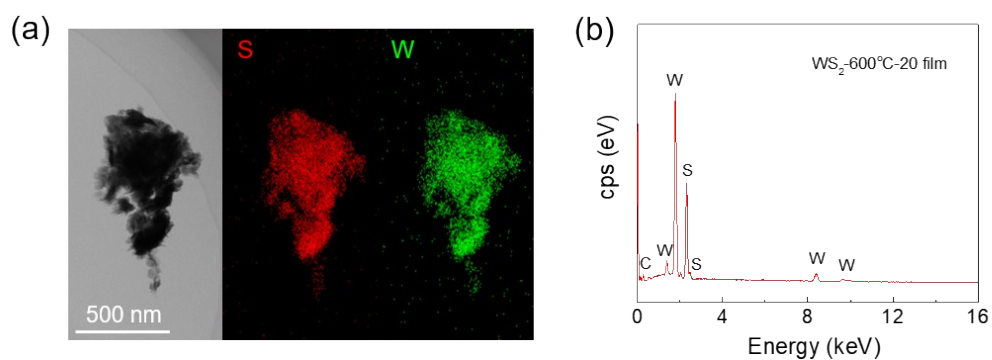

**Figure S1.** (a) Chemical mappings of W species and S species. (b) EDS pattern of WS<sub>2</sub>-600°C-20 film.

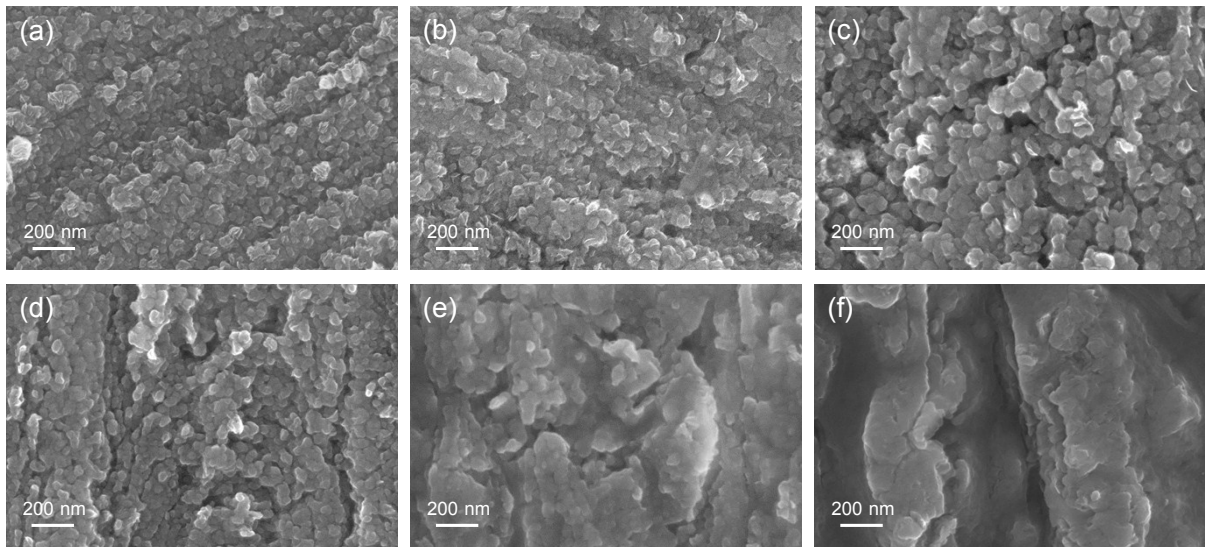

**Figure S2.** SEM images of (a) WS<sub>2</sub>-500°C-20, (b) WS<sub>2</sub>-600°C-20, (c) WS<sub>2</sub>-700°C-20, (d) WS<sub>2</sub>-800°C-20, (e) WS<sub>2</sub>-900°C-20, and (f) WS<sub>2</sub>-1000°C-20 films.

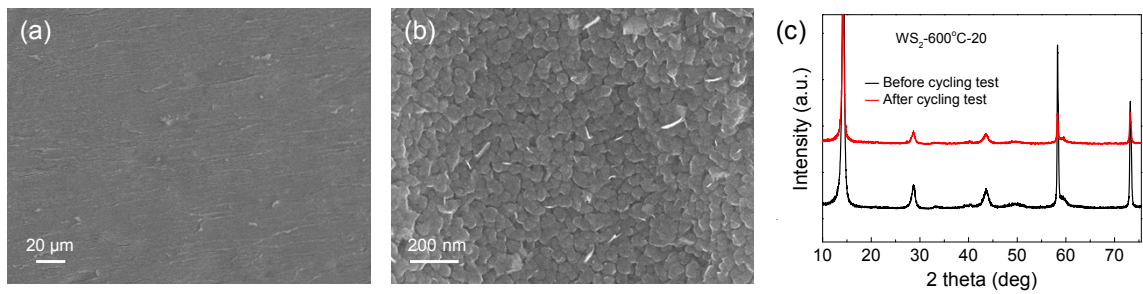

**Figure S3.** (a) Low- and (b) high-magnification SEM images of WS<sub>2</sub>-600°C-20 film after cycling test. (c) Comparison of XRD patterns of WS<sub>2</sub>-600°C-20 film before and after cycling test.

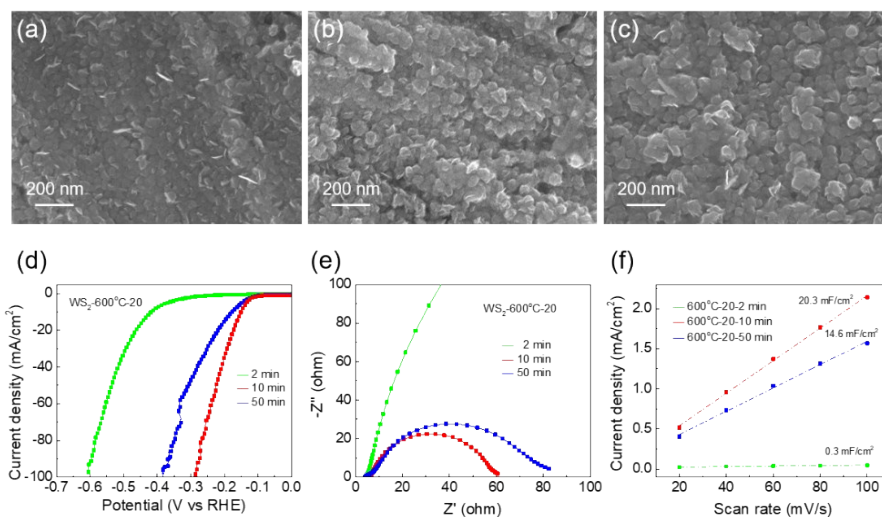

**Fig S4.** SEM images of (a) WS<sub>2</sub>-600°C-20-2min, (b) WS<sub>2</sub>-600°C-20-10min, (c) WS<sub>2</sub>-600°C-20-50min. (d) Polarization curves, (e) electrochemical impedance spectra and (f) linear fittings of the capacitive current densities at different scan rates of WS<sub>2</sub>-600°C-20 films with different reaction times.

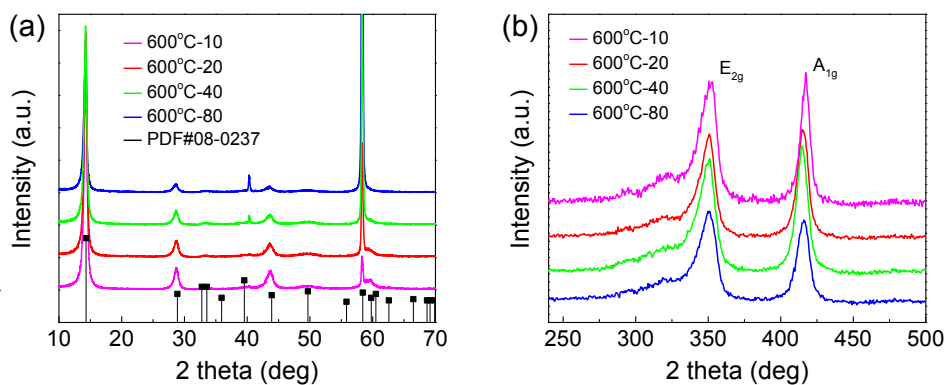

**Figure S5.** (a) XRD patterns, (b) Raman spectra of WS<sub>2</sub>-600°C films with different molar ratios of W/S.

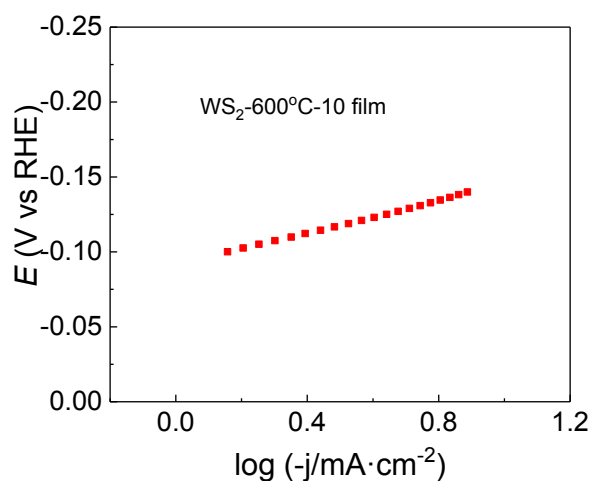

**Figure S6.** Tafel plot of WS<sub>2</sub>-600°C-10 film.

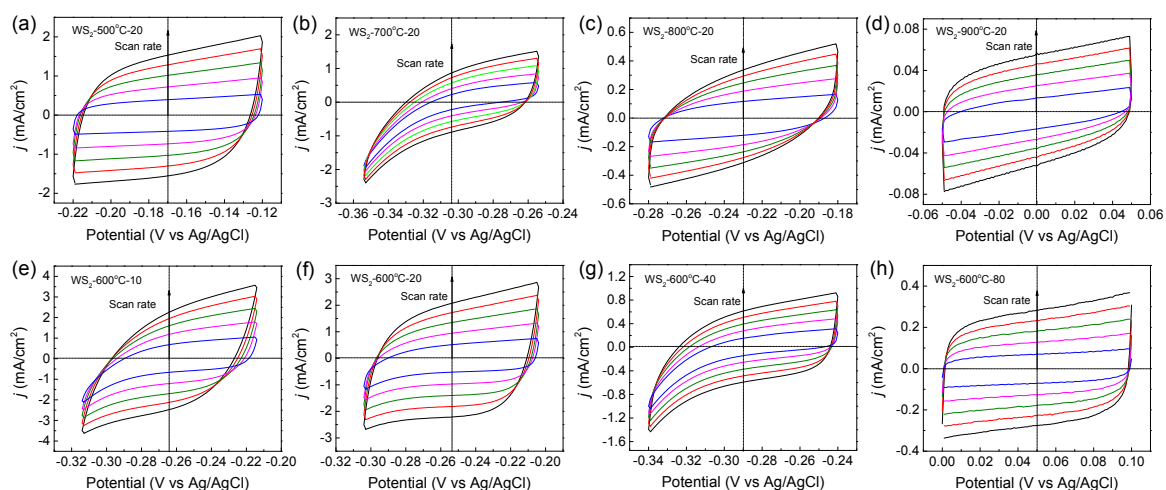

**Figure S7.** Electrochemical double-layer capacitance measurements of WS<sub>2</sub> films at different scan rates (20, 40, 60, 80, and 100 mV s<sup>-1</sup>). (a) WS<sub>2</sub>-500°C-20, (b) WS<sub>2</sub>-700°C-20, (c) WS<sub>2</sub>-800°C-20, (d) WS<sub>2</sub>-900°C-20, (e) WS<sub>2</sub>-600°C-10, (f) WS<sub>2</sub>-600°C-20, (g) WS<sub>2</sub>-600°C-40, and (h) WS<sub>2</sub>-600°C-80.

**Table S1.** Comparison of the electrocatalytic activities of WS<sub>2</sub> film with reported WS<sub>2</sub> structures for HER.

| Catalyst                                       | Substrate      | Method            | Overpotential $\eta$<br>mV/10 mA cm <sup>-2</sup> | Tafel slope<br>[mV dec <sup>-1</sup> ] | Stability    |
|------------------------------------------------|----------------|-------------------|---------------------------------------------------|----------------------------------------|--------------|
| 2H-WS <sub>2</sub> (this work)                 | W foil         | SACVT             | 137                                               | 54                                     | 200 h        |
| WS <sub>2</sub> nanoflakes <sup>1</sup>        | ITO            | exfoliation       | ~350                                              | 200                                    | N/A          |
| WS <sub>2</sub> nanosheets <sup>2</sup>        | o-carbon fiber | hydrothermal      | 278                                               | 99                                     | 1000 cycles  |
| WS <sub>2</sub> nanosheets <sup>3</sup>        | Au foil        | CVD               | ~320                                              | 100                                    | 1000 cycles  |
| 1T' WS <sub>2</sub> nanoparticles <sup>4</sup> | glassy carbon  | colloidal         | 200                                               | 50.4                                   | 46 days      |
| 2H-WS <sub>2</sub> nanoplates <sup>5</sup>     | glassy carbon  | thermal treatment | 280                                               | 60                                     | 8 h          |
| 2H-WS <sub>2</sub> nanosheets <sup>6</sup>     | glassy carbon  | exfoliation       | 205                                               | 70                                     | 500 cycles   |
| 1T-WS <sub>2</sub> nanodots <sup>7</sup>       | graphite disks | exfoliation       | 151                                               | 70                                     | 500 cycles   |
| WS <sub>2</sub> nanoribbons <sup>8</sup>       | glassy carbon  | solvothermal      | 225                                               | 68                                     | 1000 cycles  |
| WS <sub>2</sub> nanoflakes <sup>9</sup>        | glassy carbon  | solvothermal      | 100                                               | 48                                     | 10000 cycles |
| 1T' WS <sub>2</sub> nanosheets <sup>10</sup>   | glassy carbon  | exfoliation       | ~220                                              | 60                                     | 10000 cycles |
| WS <sub>2</sub> film <sup>11</sup>             | carbon cloth   | thermal treatment | ~210                                              | 68                                     | 3 h          |

## References

1. C. L. Choi, J. Feng, Y. Li, J. Wu, A. Zak, R. Tenne and H. J. Dai, *Nano Research*, 2013, **6**, 921-928.
2. X. Shang, K. L. Yan, Z. Z. Liu, S. S. Lu, B. Dong, J. Q. Chi, X. Li, Y. R. Liu, Y. M. Chai and C. G. Liu, *Appl. Surf. Sci.*, 2017, **402**, 120-128.
3. Y. Zhang, J. Shi, G. Han, M. Li, Q. Ji, D. Ma, Y. Zhang, C. Li, X. Lang, Y. Zhang and Z. Liu, *Nano Research*, 2015, **8**, 2881-2890.
4. Z. Liu, N. Li, C. Su, H. Zhao, L. Xu, Z. Yin, J. Li and Y. Du, *Nano Energy*, 2018, **50**, 176-181.
5. S. Yu, J. Kim, K. R. Yoon, J. W. Jung, J. Oh and I. D. Kim, *ACS Appl. Mater. Interfaces*, 2015, **7**, 28116-28121.
6. G. Q. Han, Y. R. Liu, W. H. Hu, B. Dong, X. Li, Y. M. Chai, Y. Q. Liu and C. G. Liu, *Mater. Chem. Phys.*, 2015, **167**, 271-277.
7. M. A. Lukowski, A. S. Daniel, C. R. English, F. Meng, A. Forticaux, R. J. Hamers and S. Jin, *Energy Environ. Sci.*, 2014, **7**, 2608-2613.
8. J. Lin, Z. Peng, G. Wang, D. Zakhidov, E. Larios, M. J. Yacaman and J. M. Tour, *Adv. Energy Mater.*, 2014, **4**, 1301875.

9. L. Cheng, W. Huang, Q. Gong, C. Liu, Z. Liu, Y. Li and H. Dai, *Angew. Chem. Int. Ed.*, 2014, **53**, 7860-7863.
10. D. Voiry, H. Yamaguchi, J. Li, R. Silva, D. C. B. Alves, T. Fujita, M. Chen, T. Asefa, V. B. Shenoy, G. Eda and M. Chhowalla, *Nat. Mater.*, 2013, **12**, 850-855.
11. T.-Y. Chen, Y.-H. Chang, C.-L. Hsu, K.-H. Wei, C.-Y. Chiang and L.-J. Li, *Int. J. Hydrogen Energy*, 2013, **38**, 12302-12309.
